# Supplementary material for: Flash glucose monitoring in gestational diabetes mellitus: study protocol for a randomised controlled trial
Source: PubMed Central journal article supplement — BMJ Open. 2021 Mar 2;11(3):e041486. doi: 10.1136/bmjopen-2020-041486 (PMC7929891; doi:10.1136/bmjopen-2020-041486), 2021-03-02
Supplement: bmjopen-2020-041486supp001.pdf [file bmjopen-2020-041486supp001.pdf]

## Kwestionariusz oceny jakościowej jadłospisów pacjentek z cukrzycą ciążową

| Lp.             | Wyróżnik                                                       | Punkty                     |                                       |
|-----------------|----------------------------------------------------------------|----------------------------|---------------------------------------|
| 1.              | Liczba posiłków                                                | I Śniadanie                | 1                                     |
|                 |                                                                | II Śniadanie               | 1                                     |
|                 |                                                                | Obiad                      | 1                                     |
|                 |                                                                | Podwieczorek               | 1                                     |
|                 |                                                                | Kolacja                    | 1                                     |
|                 |                                                                | II Kolacja                 | 1                                     |
|                 |                                                                | 2.                         | Przerwa między posiłkami w ciągu dnia |
| do 4 godz.      | 1                                                              |                            |                                       |
| powyżej 4 godz. | 0                                                              |                            |                                       |
| 3.              | Przerwa nocna                                                  | do 10 godz.                | 1                                     |
|                 |                                                                | powyżej 10 godz.           | 0                                     |
| 4.              | Uwzględnienie wody do picia w ilości co najmniej 2-2,5 l/dzień | Tak                        | 1                                     |
|                 |                                                                | Nie                        | 0                                     |
| 5.              | Ilość warzyw spożywana w ciągu dnia                            | 5 porcji                   | 5                                     |
|                 |                                                                | 4 porcje                   | 4                                     |
|                 |                                                                | 3 porcje                   | 3                                     |
|                 |                                                                | 2 porcje                   | 2                                     |
|                 |                                                                | 1 porcja                   | 1                                     |
|                 |                                                                | w żadnym posiłku           | 0                                     |
| 6.              | Ilość owoców spożywana w ciągu dnia                            | 2 porcje                   | 2                                     |
|                 |                                                                | 1 porcja                   | 1                                     |
|                 |                                                                | w żadnym posiłku           | 0                                     |
| 7.              | Uwzględnienie porcji surowych warzyw i/lub owoców              | przynajmniej w 2 posiłkach | 2                                     |
|                 |                                                                | przynajmniej w 1 posiłku   | 1                                     |
|                 |                                                                | w żadnym posiłku           | 0                                     |
| 8.              | Różnorodność warzyw i/lub owoców w jadłospisach                | Tak                        | 1                                     |
|                 |                                                                | Nie                        | 0                                     |
| 9.              | Produkty zbożowe z pełnego przemiału                           | przynajmniej w 3 posiłkach | 3                                     |
|                 |                                                                | w 2 posiłkach              | 2                                     |
|                 |                                                                | w 1 posiłku                | 1                                     |

|     |                                                                                  |                     |   |
|-----|----------------------------------------------------------------------------------|---------------------|---|
|     |                                                                                  | w żadnym posiłku    | 0 |
| 10. | <b>Różnorodność produktów węglowodanowych w jadłospisach</b>                     | Tak                 | 1 |
|     |                                                                                  | Nie                 | 0 |
|     |                                                                                  |                     |   |
| 11. | <b>Mleko i przetwory mleczne w tym napoje fermentowane</b>                       | ≥ 3w posiłkach      | 3 |
|     |                                                                                  | w 2 posiłkach       | 2 |
|     |                                                                                  | w 1 posiłku         | 1 |
|     |                                                                                  |                     |   |
| 12. | <b>Białko pełnowartościowe (zwierzęce lub strączkowe) w głównych posiłkach</b>   | w 3 posiłkach       | 3 |
|     |                                                                                  | w 2 posiłkach       | 2 |
|     |                                                                                  | w 1 posiłku         | 1 |
|     |                                                                                  | w żadnym posiłku    | 0 |
|     |                                                                                  |                     |   |
| 13. | <b>Nasiona roślin strączkowych</b>                                               | 6x na 2 tygodnie    | 2 |
|     |                                                                                  | 4x na 2 tygodnie    | 1 |
|     |                                                                                  | < 2 x na 2 tygodnie | 0 |
|     |                                                                                  |                     |   |
| 14. | <b>Ryby i/lub przetwory rybne</b>                                                | 6x na 2 tygodnie    | 2 |
|     |                                                                                  | 4x na 2 tygodnie    | 1 |
|     |                                                                                  | < 2 x na 2 tygodnie | 0 |
|     |                                                                                  |                     |   |
| 15. | <b>Różnorodność gatunkowa mięs i przetworów mięsnych w jadłospisach</b>          | Tak                 | 1 |
|     |                                                                                  | Nie                 | 0 |
|     |                                                                                  |                     |   |
| 16. | <b>Przekąski między posiłkami</b>                                                | warzywa/orzechy     | 2 |
|     |                                                                                  | owoce               | 1 |
|     |                                                                                  | słone przekąski     | 0 |
|     |                                                                                  | słodczyce           | 0 |
|     |                                                                                  |                     |   |
| 17. | <b>Zróżnicowanie technik przygotowywania potraw (uwzględnienie niskiego IG)</b>  | Tak                 | 1 |
|     |                                                                                  | Nie                 | 0 |
|     |                                                                                  |                     |   |
| 18. | <b>Zróżnicowanie konsystencji i strawności poszczególnych składników posiłku</b> | Tak                 | 1 |
|     |                                                                                  | Nie                 | 0 |
|     |                                                                                  |                     |   |
| 19. | <b>Potrawy smażone w jadłospisach</b>                                            | 4x na 2 tygodnie    | 2 |
|     |                                                                                  | 6x na 2 tygodnie    | 1 |
|     |                                                                                  | > 6 x na 2 tygodnie | 0 |
|     |                                                                                  |                     |   |

|     |                                   |                             |   |
|-----|-----------------------------------|-----------------------------|---|
| 20. | <b>Dodatek przypraw do potraw</b> | używanie ziół zamiast soli  | 1 |
|     |                                   | dosalanie potraw przy stole | 0 |
|     |                                   | dodatek cukru do potraw     | 0 |

| Lp. | Ocena końcowa jadłospisów pacjentek z cukrzycą ciężową | Przedział punktowy |
|-----|--------------------------------------------------------|--------------------|
| 1.  | prawidłowy                                             | 39-42              |
| 2.  | zadawalający                                           | 30-38              |
| 3.  | wymagający poprawy                                     | 12-29              |
| 4.  | niezadawalający                                        | ≤ 12               |
